# Supplementary material for: ΔNp73 regulates the expression of the multidrug-resistance genes ABCB1 and ABCB5 in breast cancer and melanoma cells - a short report
Source: PubMed Central journal article supplement (PMC5705756; doi:10.1007/s13402-017-0340-x), 2017-07-04
Supplement: 13402_2017_340_MOESM1_ESM.pdf [file 13402_2017_340_MOESM1_ESM.pdf]

Article Title:  $\Delta Np73$  regulates the expression of the multidrug-resistance genes *ABCB1* and *ABCB5* in breast cancer and melanoma cells - a short report

Journal Name: Cellular Oncology

Authors Names: Habib A. M. Sakil1, Marina Stantic1, Johanna Wolfsberger1, Suzanne Egyhazi Brage2, Johan Hansson2, and Margareta T. Wilhelm1\*

Affiliation: 1) Karolinska Institutet, Department of Microbiology, Tumor and Cell biology (MTC), 171 77 Stockholm, Sweden

2) Karolinska Institutet, Department of Oncology-Pathology, 171 76 Stockholm, Sweden

\*Corresponding Author: Margareta T. Wilhelm

email: Margareta.Wilhelm@ki.se

**Supplementary Table 1** Primer sequences used for qRT-PCR.

| <b>Primer</b>      | <b>Forward 5'-3'</b>     | <b>Reverse 5'-3'</b>    |
|--------------------|--------------------------|-------------------------|
| ABCB5              | ATTGGAGTGGTTAGTCAAGAGCC  | AGTCACATCATCTCGTCCATACT |
| ABCA10             | GGAGACGACAAATCTATGCAGTG  | CCCAACAATGAGTTTCACGAGT  |
| ABCA9              | TTGCACCTGAATCCAAAACCTACC | TGACTCTCACTGCGTCTATTGAA |
| ABCB1              | TTGCTGCTTACATTCAGGTTTCA  | AGCCTATCTCCTGTGCGCATTA  |
| ABCA8              | TGAAATGGATGCCGATCCTTC    | AGTATTGCAGTGATTTGGCCTT  |
| p73 $\Delta$ Ex2/3 | TGCAGGCCAGTTCAATCTGC     | TCCGTGTTGGAGGGGATGACA   |
| 28s                | TTGAAAATCCGGGGGAG        | ACATGTTCACACATGCC       |

**Taqman Primer**

|               |                                               |
|---------------|-----------------------------------------------|
| GAPDH         | Cat # 4333764F, Thermo fisher scientific      |
| $\Delta Np73$ | Cat # Hs01065727_m1, Thermo fisher scientific |
