# Supplementary material for: ΔNp73 regulates the expression of the multidrug-resistance genes ABCB1 and ABCB5 in breast cancer and melanoma cells - a short report
Source: PubMed Central journal article supplement (PMC5705756; doi:10.1007/s13402-017-0340-x), 2017-07-04
Supplement: 13402_2017_340_MOESM2_ESM.pdf [file 13402_2017_340_MOESM2_ESM.pdf]

**Sakil et al**

Article Title:  $\Delta$ Np73 regulates the expression of the multidrug-resistance genes *ABCB1* and *ABCB5* in breast cancer and melanoma cells - a short report

Journal Name: Cellular Oncology

Authors Names: Habib A. M. Sakil<sup>1</sup>, Marina Stantic<sup>1</sup>, Johanna Wolfsberger<sup>1</sup>, Suzanne Egyhazi Brage<sup>2</sup>, Johan Hansson<sup>2</sup>, and Margareta T. Wilhelm<sup>1\*</sup>

Affiliation: 1) Karolinska Institutet, Department of Microbiology, Tumor and Cell biology (MTC), 171 77 Stockholm, Sweden

2) Karolinska Institutet, Department of Oncology-Pathology, 171 76 Stockholm, Sweden

\*Corresponding Author: Margareta T. Wilhelm

email: Margareta.Wilhelm@ki.se

**Supplementary Table 2** List of genes that were upregulated (>2 FC) in the  $\Delta$ Np73 high expressing breast cancer patients. Adapted from Stantic et al. (2015) Proc Natl Acad Sci USA, 2015.112(1):p. 220-5.

| GeneName   | Fold Change | P.Val |
|------------|-------------|-------|
| PAK7       | 6,925       | 9E-37 |
| C8orf79    | 3,392       | 1E-35 |
| OVCH2      | 6,768       | 2E-35 |
| GPR144     | 8,481       | 5E-35 |
| B3GALT1    | 5,195       | 1E-34 |
| NCRNA00086 | 3,782       | 1E-34 |
| CAPZA3     | 3,652       | 1E-34 |
| PIK3C2G    | 5,442       | 2E-33 |
| DLK2       | 4,845       | 7E-33 |
| C2orf40    | 6,320       | 2E-32 |
| RNF186     | 5,409       | 2E-32 |
| FAM196B    | 7,362       | 3E-32 |
| SAMD5      | 5,692       | 4E-32 |
| D4S234E    | 4,086       | 5E-32 |
| LPPR1      | 4,986       | 8E-32 |
| HS3ST4     | 4,713       | 9E-32 |
| SCN4B      | 3,542       | 9E-32 |
| CLDN19     | 7,403       | 2E-31 |
| TRPM3      | 5,573       | 2E-31 |

|          |        |       |
|----------|--------|-------|
| KLHL13   | 4,545  | 2E-31 |
| CHST9    | 4,397  | 2E-31 |
| C11orf92 | 3,695  | 2E-31 |
| SLC7A14  | 5,175  | 3E-31 |
| SYN2     | 4,030  | 3E-31 |
| KLHL29   | 3,808  | 3E-31 |
| HOXA2    | 3,503  | 3E-31 |
| HOXA6    | 3,525  | 5E-31 |
| EDN3     | 6,375  | 6E-31 |
| FAT2     | 4,178  | 6E-31 |
| GRIA4    | 6,665  | 7E-31 |
| TP63     | 4,606  | 7E-31 |
| COL17A1  | 5,146  | 1E-30 |
| KCNJ16   | 4,658  | 1E-30 |
| EFCAB1   | 4,526  | 1E-30 |
| CLDN11   | 3,928  | 1E-30 |
| KCNH8    | 3,927  | 2E-30 |
| GAS2     | 2,920  | 2E-30 |
| PDE1C    | 5,070  | 3E-30 |
| SYNM     | 4,756  | 3E-30 |
| HOXA5    | 3,556  | 4E-30 |
| SLC7A3   | 5,988  | 6E-30 |
| DACT2    | 4,551  | 6E-30 |
| TCEAL2   | 2,910  | 7E-30 |
| PACRG    | 2,893  | 7E-30 |
| CLCA4    | 5,428  | 8E-30 |
| GFAP     | 4,959  | 8E-30 |
| DRD2     | 3,522  | 9E-30 |
| LRRC3B   | 6,120  | 1E-29 |
| SCN3A    | 5,603  | 1E-29 |
| TSLP     | 4,412  | 1E-29 |
| NGFR     | 3,525  | 1E-29 |
| GABRA4   | 14,121 | 3E-29 |
| EPHB1    | 4,027  | 3E-29 |
| SPRY2    | 3,117  | 3E-29 |
| PAK3     | 4,296  | 4E-29 |
| PSD2     | 4,212  | 4E-29 |
| SLC27A6  | 4,194  | 4E-29 |
| RNASE7   | 4,189  | 4E-29 |
| FEZF2    | 3,663  | 4E-29 |

|           |       |       |
|-----------|-------|-------|
| CCDC8     | 3,379 | 7E-29 |
| LOC286367 | 2,774 | 7E-29 |
| HPSE2     | 5,260 | 8E-29 |
| PTN       | 4,992 | 8E-29 |
| ANGPTL7   | 8,224 | 1E-28 |
| VIT       | 4,973 | 1E-28 |
| SCN5A     | 3,559 | 1E-28 |
| RELN      | 6,192 | 2E-28 |
| HAP1      | 4,574 | 2E-28 |
| NRG2      | 4,010 | 2E-28 |
| DST       | 3,467 | 2E-28 |
| HOXA4     | 3,314 | 2E-28 |
| GPM6B     | 3,283 | 2E-28 |
| GPRASP1   | 3,013 | 2E-28 |
| EDAR      | 3,008 | 2E-28 |
| BOC       | 2,613 | 2E-28 |
| LOC728264 | 6,131 | 3E-28 |
| WIF1      | 3,501 | 3E-28 |
| NRXN1     | 2,987 | 3E-28 |
| SPHKAP    | 5,061 | 4E-28 |
| DMD       | 4,337 | 4E-28 |
| NEUROG2   | 3,885 | 6E-28 |
| GNAL      | 3,106 | 6E-28 |
| IL11RA    | 2,231 | 6E-28 |
| USP44     | 3,192 | 8E-28 |
| RIMS3     | 2,619 | 8E-28 |
| AQP4      | 2,638 | 9E-28 |
| NTF4      | 4,563 | 1E-27 |
| TSHZ2     | 3,770 | 1E-27 |
| CACHD1    | 2,875 | 1E-27 |
| SOBP      | 2,213 | 1E-27 |
| SFRP1     | 4,351 | 2E-27 |
| CAPN11    | 3,909 | 2E-27 |
| RERGL     | 3,905 | 2E-27 |
| TEPP      | 3,817 | 2E-27 |
| RNF39     | 2,879 | 2E-27 |
| KCTD4     | 2,129 | 2E-27 |
| KY        | 5,803 | 3E-27 |
| SCN2B     | 4,688 | 3E-27 |
| RYR3      | 4,387 | 3E-27 |

|          |       |       |
|----------|-------|-------|
| CLDN8    | 3,376 | 3E-27 |
| NDRG2    | 3,196 | 3E-27 |
| GRAMD3   | 2,508 | 3E-27 |
| TP53AIP1 | 4,154 | 4E-27 |
| ASXL3    | 2,894 | 4E-27 |
| NPY2R    | 7,609 | 5E-27 |
| IL17B    | 4,741 | 5E-27 |
| DSC1     | 4,531 | 6E-27 |
| C10orf90 | 3,728 | 6E-27 |
| HTR2A    | 3,656 | 6E-27 |
| SCN3B    | 2,817 | 6E-27 |
| ALX4     | 4,362 | 7E-27 |
| FAM126A  | 2,827 | 7E-27 |
| MRAP2    | 2,554 | 7E-27 |
| MRGPRX3  | 3,939 | 8E-27 |
| HLF      | 4,137 | 9E-27 |
| MATN2    | 3,482 | 9E-27 |
| BAI3     | 2,195 | 9E-27 |
| FAM150B  | 4,631 | 1E-26 |
| ITPRIPL1 | 3,430 | 1E-26 |
| WDR86    | 3,311 | 1E-26 |
| TRIM29   | 3,029 | 1E-26 |
| TCEAL7   | 3,004 | 1E-26 |
| TMEM220  | 2,741 | 1E-26 |
| HOXA7    | 2,528 | 1E-26 |
| NKPD1    | 2,182 | 1E-26 |
| KIT      | 5,198 | 2E-26 |
| EGFR     | 4,124 | 2E-26 |
| LAMB3    | 2,716 | 2E-26 |
| EMILIN3  | 2,597 | 2E-26 |
| SMYD1    | 7,093 | 3E-26 |
| MYH11    | 4,855 | 3E-26 |
| STAC2    | 3,924 | 3E-26 |
| ID4      | 3,090 | 3E-26 |
| HOXA3    | 2,705 | 3E-26 |
| PELI2    | 2,485 | 3E-26 |
| ZC3H12B  | 2,309 | 3E-26 |
| AMOTL1   | 2,136 | 3E-26 |
| FAM181A  | 2,076 | 3E-26 |
| SCN2A    | 4,225 | 4E-26 |

|              |       |       |
|--------------|-------|-------|
| PTCH2        | 2,686 | 4E-26 |
| YPEL4        | 2,534 | 4E-26 |
| CNTNAP3      | 3,689 | 5E-26 |
| PTPRZ1       | 2,765 | 5E-26 |
| SLC25A27     | 3,189 | 7E-26 |
| TNS4         | 2,872 | 7E-26 |
| OXTR         | 7,824 | 8E-26 |
| IRX1         | 3,389 | 8E-26 |
| FLJ13197     | 2,520 | 8E-26 |
| KCNE1        | 5,746 | 1E-25 |
| SLCO1A2      | 5,067 | 1E-25 |
| ITM2A        | 3,059 | 1E-25 |
| CYR1         | 2,341 | 1E-25 |
| NIPSNAP3B    | 2,337 | 1E-25 |
| PTCH1        | 2,293 | 1E-25 |
| NCRNA00087   | 2,256 | 1E-25 |
| CDKN1C       | 2,232 | 1E-25 |
| DPP6         | 5,321 | 2E-25 |
| MAMDC2       | 4,113 | 2E-25 |
| OR2L13       | 3,580 | 2E-25 |
| SOX10        | 3,549 | 2E-25 |
| CCL28        | 3,534 | 2E-25 |
| AVPR2        | 2,836 | 2E-25 |
| FAM13C       | 2,803 | 2E-25 |
| DKFZP434L187 | 2,633 | 2E-25 |
| AQP1         | 2,542 | 2E-25 |
| AASS         | 2,197 | 2E-25 |
| ROPN1B       | 2,013 | 2E-25 |
| STAB2        | 4,848 | 3E-25 |
| ABCA10       | 4,716 | 3E-25 |
| SCARA5       | 4,653 | 3E-25 |
| PHYHIPL      | 4,206 | 3E-25 |
| FAM189A2     | 3,397 | 3E-25 |
| CDH12        | 3,157 | 3E-25 |
| BBOX1        | 3,117 | 3E-25 |
| SH3BGRL2     | 2,335 | 3E-25 |
| GNG7         | 2,252 | 3E-25 |
| TLE4         | 2,109 | 3E-25 |
| DDX26B       | 2,056 | 3E-25 |
| PAMR1        | 4,947 | 4E-25 |

|          |       |       |
|----------|-------|-------|
| ATOH8    | 3,283 | 4E-25 |
| SNCA     | 2,516 | 4E-25 |
| C1orf190 | 2,263 | 4E-25 |
| BEND5    | 2,099 | 4E-25 |
| BMP5     | 2,081 | 4E-25 |
| EVC2     | 2,034 | 4E-25 |
| OSR1     | 3,716 | 5E-25 |
| SLC16A12 | 3,337 | 5E-25 |
| CGB7     | 2,971 | 5E-25 |
| C7orf51  | 2,519 | 5E-25 |
| EFNB3    | 2,369 | 5E-25 |
| N4BP2L1  | 2,056 | 5E-25 |
| CX3CL1   | 3,891 | 6E-25 |
| ROBO3    | 2,579 | 6E-25 |
| FXVD1    | 4,105 | 7E-25 |
| CSRNP3   | 3,931 | 7E-25 |
| C21orf34 | 3,190 | 7E-25 |
| SOSTDC1  | 3,823 | 8E-25 |
| PLD5     | 3,640 | 8E-25 |
| CRB2     | 3,446 | 8E-25 |
| C18orf34 | 3,233 | 8E-25 |
| C11orf93 | 3,190 | 9E-25 |
| GLRA4    | 3,865 | 1E-24 |
| KCNH3    | 3,577 | 1E-24 |
| ASTN1    | 3,357 | 1E-24 |
| ABCB1    | 3,327 | 1E-24 |
| GIPC2    | 3,166 | 1E-24 |
| KLF15    | 3,088 | 1E-24 |
| MYOM1    | 3,062 | 1E-24 |
| ARL4A    | 2,609 | 1E-24 |
| NPM2     | 2,573 | 1E-24 |
| DLGAP2   | 2,563 | 1E-24 |
| PROS1    | 2,554 | 1E-24 |
| PCDHGB7  | 2,377 | 1E-24 |
| BACH2    | 2,212 | 1E-24 |
| ST8SIA2  | 4,143 | 2E-24 |
| DBC1     | 3,760 | 2E-24 |
| IL33     | 3,410 | 2E-24 |
| TESC     | 3,385 | 2E-24 |
| LPHN3    | 3,183 | 2E-24 |

|           |       |       |
|-----------|-------|-------|
| LEPR      | 3,029 | 2E-24 |
| NR3C2     | 2,762 | 2E-24 |
| CCDC129   | 2,570 | 2E-24 |
| IL17RD    | 2,564 | 2E-24 |
| ZNF204P   | 2,447 | 2E-24 |
| C5orf4    | 2,240 | 2E-24 |
| LOC93432  | 2,101 | 2E-24 |
| KCNMB1    | 3,883 | 3E-24 |
| AK5       | 3,636 | 3E-24 |
| SSTR1     | 2,634 | 3E-24 |
| FZD7      | 2,228 | 3E-24 |
| DCT       | 5,805 | 4E-24 |
| CRTAC1    | 2,457 | 4E-24 |
| LOC285830 | 2,091 | 4E-24 |
| CHST3     | 2,086 | 4E-24 |
| TRPC6     | 2,043 | 4E-24 |
| NTRK2     | 3,083 | 5E-24 |
| RASSF6    | 2,400 | 5E-24 |
| TINAGL1   | 2,290 | 5E-24 |
| PRIMA1    | 2,495 | 6E-24 |
| GPR75     | 2,250 | 6E-24 |
| CCDC136   | 2,243 | 6E-24 |
| CRHR1     | 2,139 | 6E-24 |
| FMO2      | 3,800 | 7E-24 |
| MESTIT1   | 2,907 | 7E-24 |
| PPP1R12B  | 2,557 | 7E-24 |
| SH3TC2    | 2,429 | 7E-24 |
| SDPR      | 3,960 | 8E-24 |
| ADAMTS5   | 3,528 | 8E-24 |
| TSPAN7    | 2,768 | 8E-24 |
| SEMA5A    | 2,446 | 8E-24 |
| DSC3      | 2,165 | 8E-24 |
| TMEM100   | 2,820 | 9E-24 |
| TMEM178   | 3,866 | 1E-23 |
| C6orf174  | 2,876 | 1E-23 |
| ODZ2      | 2,744 | 1E-23 |
| LGR6      | 2,615 | 1E-23 |
| TDRD10    | 2,484 | 1E-23 |
| OR7C1     | 2,380 | 1E-23 |
| C9orf125  | 2,348 | 1E-23 |

|            |       |       |
|------------|-------|-------|
| PRCD       | 2,187 | 1E-23 |
| MET        | 2,052 | 1E-23 |
| NRG1       | 3,867 | 2E-23 |
| ISM1       | 3,191 | 2E-23 |
| KRT14      | 3,110 | 2E-23 |
| LRRC2      | 3,096 | 2E-23 |
| RIC3       | 2,921 | 2E-23 |
| EFHA2      | 2,792 | 2E-23 |
| PPAP2B     | 2,110 | 2E-23 |
| CDC14B     | 2,078 | 2E-23 |
| BEGAIN     | 2,015 | 2E-23 |
| IGSF10     | 3,984 | 3E-23 |
| TACR1      | 3,639 | 3E-23 |
| LAMA3      | 2,588 | 3E-23 |
| PPP2R2B    | 2,558 | 3E-23 |
| SLC35F3    | 2,413 | 3E-23 |
| NCRNA00092 | 2,390 | 3E-23 |
| PRKD1      | 2,102 | 3E-23 |
| RIPK4      | 2,020 | 3E-23 |
| CD300LG    | 4,235 | 4E-23 |
| LRRTM2     | 3,228 | 4E-23 |
| NFIB       | 2,436 | 4E-23 |
| TTYH1      | 2,026 | 4E-23 |
| TNXB       | 3,589 | 5E-23 |
| CPA1       | 3,330 | 5E-23 |
| C2orf82    | 2,880 | 5E-23 |
| IFFO2      | 2,353 | 5E-23 |
| HOXA9      | 2,322 | 5E-23 |
| PDGFA      | 2,303 | 5E-23 |
| CBX7       | 2,133 | 5E-23 |
| LRIG3      | 2,122 | 5E-23 |
| CXCL2      | 5,513 | 6E-23 |
| AKAP6      | 2,546 | 6E-23 |
| LOC441869  | 2,065 | 6E-23 |
| MASP1      | 3,328 | 7E-23 |
| KCNB1      | 2,605 | 7E-23 |
| BMX        | 3,272 | 8E-23 |
| GRIK5      | 2,388 | 8E-23 |
| NAV2       | 2,318 | 8E-23 |
| FGF17      | 2,254 | 8E-23 |

|           |       |       |
|-----------|-------|-------|
| SEMA6D    | 2,114 | 8E-23 |
| LOC134466 | 2,994 | 9E-23 |
| SLC17A7   | 2,904 | 9E-23 |
| FAM13A    | 2,361 | 9E-23 |
| LMOD1     | 3,435 | 1E-22 |
| C2orf88   | 3,380 | 1E-22 |
| CHRD1     | 3,359 | 1E-22 |
| SMAD9     | 2,446 | 1E-22 |
| CORO2B    | 2,360 | 1E-22 |
| MEIS2     | 2,311 | 1E-22 |
| ITGA10    | 2,278 | 1E-22 |
| RHOJ      | 2,188 | 1E-22 |
| ANKRD35   | 2,150 | 1E-22 |
| GSN       | 2,143 | 1E-22 |
| MASP2     | 2,110 | 1E-22 |
| LPCAT2    | 2,026 | 1E-22 |
| CA4       | 3,760 | 2E-22 |
| CHL1      | 3,573 | 2E-22 |
| GPIHBP1   | 3,203 | 2E-22 |
| HAPLN4    | 2,955 | 2E-22 |
| KRT5      | 2,789 | 2E-22 |
| MAML2     | 2,747 | 2E-22 |
| TRPM6     | 2,393 | 2E-22 |
| DLG2      | 2,353 | 2E-22 |
| SHE       | 2,199 | 2E-22 |
| ARHGAP20  | 3,232 | 3E-22 |
| MYLK      | 3,172 | 3E-22 |
| ALDH1A2   | 2,941 | 3E-22 |
| PGM5      | 2,787 | 3E-22 |
| FGF2      | 2,745 | 3E-22 |
| THSD7B    | 2,680 | 3E-22 |
| SYT15     | 2,313 | 3E-22 |
| APBA1     | 2,005 | 3E-22 |
| CRIM1     | 2,004 | 3E-22 |
| FREM1     | 3,323 | 4E-22 |
| PLCH2     | 2,601 | 4E-22 |
| LOC642587 | 2,588 | 4E-22 |
| RGN       | 2,507 | 4E-22 |
| LEPREL1   | 2,235 | 4E-22 |
| TXNIP     | 2,094 | 4E-22 |

|              |       |       |
|--------------|-------|-------|
| TPO          | 3,144 | 5E-22 |
| FGF1         | 2,923 | 6E-22 |
| RASSF9       | 2,609 | 6E-22 |
| MYOM3        | 2,569 | 6E-22 |
| B3GAT1       | 2,303 | 6E-22 |
| RASGEF1C     | 2,143 | 6E-22 |
| CA3          | 2,021 | 6E-22 |
| ABCB5        | 5,205 | 7E-22 |
| KCTD14       | 2,782 | 7E-22 |
| LOC572558    | 2,758 | 7E-22 |
| PDZD4        | 2,348 | 7E-22 |
| COL25A1      | 2,149 | 7E-22 |
| C7orf41      | 2,013 | 7E-22 |
| PDE2A        | 2,929 | 8E-22 |
| LGI4         | 2,230 | 8E-22 |
| FAM3D        | 2,825 | 9E-22 |
| MEOX2        | 2,587 | 9E-22 |
| DENND2A      | 2,427 | 9E-22 |
| COL4A6       | 2,226 | 9E-22 |
| FIGF         | 5,664 | 1E-21 |
| ADCYAP1R1    | 3,488 | 1E-21 |
| FAM70A       | 3,072 | 1E-21 |
| KRT15        | 2,989 | 1E-21 |
| ITIH5        | 2,893 | 1E-21 |
| KCNA6        | 2,808 | 1E-21 |
| PRRG3        | 2,795 | 1E-21 |
| JPH4         | 2,609 | 1E-21 |
| LOC100126784 | 2,577 | 1E-21 |
| TDRD6        | 2,540 | 1E-21 |
| PALMD        | 2,447 | 1E-21 |
| PHYHIP       | 2,421 | 1E-21 |
| LOC399959    | 2,375 | 1E-21 |
| GPR146       | 2,345 | 1E-21 |
| LCN10        | 2,298 | 1E-21 |
| C1orf130     | 2,296 | 1E-21 |
| JAM2         | 2,264 | 1E-21 |
| TMTC1        | 2,249 | 1E-21 |
| TUBB2B       | 2,233 | 1E-21 |
| TF           | 2,231 | 1E-21 |
| IFNE         | 2,160 | 1E-21 |

|              |       |       |
|--------------|-------|-------|
| ATP1B2       | 2,097 | 1E-21 |
| MME          | 3,892 | 2E-21 |
| HIF3A        | 3,593 | 2E-21 |
| ABCA9        | 3,524 | 2E-21 |
| EGR1         | 3,455 | 2E-21 |
| KCNMB2       | 3,377 | 2E-21 |
| SLC13A2      | 2,802 | 2E-21 |
| LOC284578    | 2,592 | 2E-21 |
| ANKRD29      | 2,453 | 2E-21 |
| TNS1         | 2,409 | 2E-21 |
| LOC100124692 | 2,370 | 2E-21 |
| IL34         | 2,322 | 2E-21 |
| C15orf51     | 2,263 | 2E-21 |
| SH3RF2       | 2,205 | 2E-21 |
| STOX2        | 2,175 | 2E-21 |
| PLSCR4       | 2,130 | 2E-21 |
| LTBP4        | 2,099 | 2E-21 |
| ARRDC3       | 2,096 | 2E-21 |
| ZDHHC15      | 2,087 | 2E-21 |
| GLT25D2      | 2,048 | 2E-21 |
| PIK3R1       | 2,046 | 2E-21 |
| ALDH1L1      | 2,796 | 3E-21 |
| KCNS1        | 2,684 | 3E-21 |
| RBMS3        | 2,515 | 3E-21 |
| KIAA1683     | 2,354 | 3E-21 |
| NAP1L2       | 2,314 | 3E-21 |
| ART5         | 2,239 | 3E-21 |
| TRIM2        | 2,180 | 3E-21 |
| BTNL9        | 3,398 | 4E-21 |
| PCYT1B       | 2,319 | 4E-21 |
| RARB         | 2,130 | 4E-21 |
| CYP39A1      | 2,127 | 4E-21 |
| SPARCL1      | 2,109 | 4E-21 |
| DTX1         | 2,055 | 4E-21 |
| CCL14        | 3,176 | 5E-21 |
| PTCHD1       | 2,962 | 5E-21 |
| GRRP1        | 2,295 | 5E-21 |
| MAB21L1      | 3,169 | 6E-21 |
| PLCXD3       | 2,949 | 6E-21 |
| ITGA7        | 2,504 | 6E-21 |

|          |       |       |
|----------|-------|-------|
| LAMA1    | 2,494 | 6E-21 |
| MOBKL2B  | 2,130 | 6E-21 |
| HYMAI    | 2,078 | 6E-21 |
| ADRB2    | 2,568 | 7E-21 |
| TGFBR3   | 2,552 | 7E-21 |
| ANKK1    | 2,528 | 7E-21 |
| NKAPL    | 2,397 | 7E-21 |
| GLB1L3   | 2,089 | 7E-21 |
| PROL1    | 5,089 | 8E-21 |
| LIFR     | 2,842 | 8E-21 |
| LHFP     | 2,179 | 8E-21 |
| CNN1     | 4,853 | 9E-21 |
| C4orf49  | 3,246 | 9E-21 |
| ACSM3    | 2,886 | 9E-21 |
| CSRP1    | 2,044 | 9E-21 |
| PIGR     | 4,270 | 1E-20 |
| LOXL4    | 2,931 | 1E-20 |
| INMT     | 2,639 | 1E-20 |
| FOLR1    | 2,461 | 1E-20 |
| GGTA1    | 2,358 | 1E-20 |
| SCN11A   | 2,244 | 1E-20 |
| SLC16A11 | 2,231 | 1E-20 |
| PDLIM4   | 2,199 | 1E-20 |
| WSCD1    | 2,180 | 1E-20 |
| CXorf36  | 2,177 | 1E-20 |
| TAL1     | 2,159 | 1E-20 |
| ZNF677   | 2,144 | 1E-20 |
| IL22RA1  | 2,027 | 1E-20 |
| HAS3     | 4,224 | 2E-20 |
| ANGPT4   | 2,926 | 2E-20 |
| SYT8     | 2,830 | 2E-20 |
| PROX1    | 2,790 | 2E-20 |
| DNASE1L3 | 2,689 | 2E-20 |
| CLDN5    | 2,558 | 2E-20 |
| RCAN1    | 2,557 | 2E-20 |
| MEOX1    | 2,537 | 2E-20 |
| S100B    | 2,520 | 2E-20 |
| GSTM5    | 2,474 | 2E-20 |
| CADM3    | 2,459 | 2E-20 |
| SEMA3G   | 2,273 | 2E-20 |

|          |       |       |
|----------|-------|-------|
| ZNF483   | 2,117 | 2E-20 |
| PIP5K1B  | 2,093 | 2E-20 |
| MCF2L2   | 2,002 | 2E-20 |
| EGR2     | 3,198 | 3E-20 |
| PRDM16   | 2,643 | 3E-20 |
| LRRTM4   | 2,530 | 3E-20 |
| KL       | 2,441 | 3E-20 |
| TGFBR2   | 2,195 | 3E-20 |
| CDH23    | 2,122 | 3E-20 |
| HEPACAM  | 3,299 | 4E-20 |
| DCX      | 3,278 | 4E-20 |
| NPR1     | 2,706 | 4E-20 |
| LAMC3    | 2,648 | 4E-20 |
| NPAS4    | 2,506 | 4E-20 |
| AGAP11   | 2,316 | 4E-20 |
| MID1     | 2,219 | 4E-20 |
| RUNDC3B  | 2,213 | 4E-20 |
| ARID5A   | 2,006 | 4E-20 |
| PDK4     | 3,023 | 5E-20 |
| GREM2    | 2,592 | 5E-20 |
| LIMS2    | 2,332 | 5E-20 |
| PLEKHH2  | 2,254 | 5E-20 |
| FHOD3    | 2,050 | 5E-20 |
| ABCA8    | 3,274 | 6E-20 |
| DCAF12L1 | 2,519 | 6E-20 |
| F10      | 2,507 | 6E-20 |
| PEAR1    | 2,320 | 6E-20 |
| PRX      | 2,102 | 6E-20 |
| GRAMD2   | 2,007 | 6E-20 |
| SLC22A11 | 3,123 | 7E-20 |
| MYBPC1   | 2,182 | 7E-20 |
| CNKS2    | 2,630 | 8E-20 |
| C1orf175 | 2,374 | 8E-20 |
| STX19    | 2,145 | 8E-20 |
| NTRK3    | 2,050 | 8E-20 |
| PRNP     | 2,002 | 8E-20 |
| ATP13A5  | 3,080 | 9E-20 |
| ADAM33   | 3,378 | 1E-19 |
| EGR3     | 3,109 | 1E-19 |
| DARC     | 2,749 | 1E-19 |

|          |       |       |
|----------|-------|-------|
| CAV2     | 2,472 | 1E-19 |
| FLJ42875 | 2,426 | 1E-19 |
| ZSCAN23  | 2,406 | 1E-19 |
| SLAIN1   | 2,221 | 1E-19 |
| RHOU     | 2,094 | 1E-19 |
| IRX4     | 2,089 | 1E-19 |
| TMEM88   | 2,050 | 1E-19 |
| SCGB3A1  | 3,460 | 2E-19 |
| TMEM132C | 3,375 | 2E-19 |
| CDH22    | 3,289 | 2E-19 |
| CKMT2    | 3,087 | 2E-19 |
| GPR17    | 3,037 | 2E-19 |
| GDF10    | 2,681 | 2E-19 |
| FAM107A  | 2,672 | 2E-19 |
| RNF150   | 2,456 | 2E-19 |
| NLGN1    | 2,450 | 2E-19 |
| EBF3     | 2,373 | 2E-19 |
| PDGFD    | 2,212 | 2E-19 |
| MYH3     | 2,127 | 2E-19 |
| GABRP    | 2,047 | 2E-19 |
| KLHL33   | 2,037 | 2E-19 |
| GAL3ST1  | 2,018 | 2E-19 |
| ZNF662   | 2,003 | 2E-19 |
| ZBTB16   | 3,114 | 3E-19 |
| CAV1     | 2,713 | 3E-19 |
| NAALAD2  | 2,585 | 3E-19 |
| HSPB2    | 2,407 | 3E-19 |
| TCEAL5   | 2,293 | 3E-19 |
| LDB2     | 2,161 | 3E-19 |
| EMCN     | 2,160 | 3E-19 |
| FLRT2    | 2,155 | 3E-19 |
| PTX3     | 2,108 | 3E-19 |
| ZNF462   | 2,020 | 3E-19 |
| KRT17    | 2,761 | 4E-19 |
| PPP1R14A | 2,617 | 4E-19 |
| CASP12   | 2,570 | 4E-19 |
| ZSCAN4   | 2,518 | 4E-19 |
| ANKRD53  | 2,436 | 4E-19 |
| USHBP1   | 2,267 | 4E-19 |
| RRN3P1   | 2,078 | 4E-19 |

|          |       |       |
|----------|-------|-------|
| CCL16    | 2,052 | 4E-19 |
| OBSCN    | 2,030 | 4E-19 |
| RND3     | 2,010 | 4E-19 |
| LRFN5    | 2,677 | 5E-19 |
| HFM1     | 2,589 | 5E-19 |
| MYOCD    | 2,413 | 5E-19 |
| WASF3    | 2,205 | 5E-19 |
| RAPGEF3  | 2,087 | 5E-19 |
| TPTE2P1  | 2,030 | 5E-19 |
| PYGM     | 2,233 | 6E-19 |
| C1QL2    | 2,200 | 6E-19 |
| C4BPA    | 2,049 | 6E-19 |
| CLIP4    | 2,016 | 6E-19 |
| IGFBP6   | 2,871 | 7E-19 |
| SCN4A    | 2,635 | 8E-19 |
| VSIG2    | 2,361 | 8E-19 |
| GPC3     | 2,234 | 8E-19 |
| NTN5     | 2,146 | 8E-19 |
| PI16     | 3,960 | 9E-19 |
| LUZP2    | 2,861 | 9E-19 |
| FHL5     | 2,581 | 9E-19 |
| APCDD1L  | 3,745 | 1E-18 |
| LCN6     | 2,583 | 1E-18 |
| CDH4     | 2,556 | 1E-18 |
| ENPP2    | 2,481 | 1E-18 |
| APCDD1   | 2,329 | 1E-18 |
| EDNRB    | 2,204 | 1E-18 |
| PLAGL1   | 2,128 | 1E-18 |
| CPAMD8   | 2,116 | 1E-18 |
| SPRY1    | 2,065 | 1E-18 |
| SPOCK3   | 2,052 | 1E-18 |
| ABCA5    | 2,041 | 1E-18 |
| SAA4     | 2,469 | 2E-18 |
| CD164L2  | 2,379 | 2E-18 |
| COL4A3   | 2,365 | 2E-18 |
| MT1X     | 2,269 | 2E-18 |
| CPEB1    | 2,255 | 2E-18 |
| GOLGA6L5 | 2,196 | 2E-18 |
| ETV5     | 2,099 | 2E-18 |
| CYTL1    | 2,096 | 2E-18 |

|           |       |       |
|-----------|-------|-------|
| CNGA1     | 2,040 | 2E-18 |
| TMEM71    | 2,022 | 2E-18 |
| RGS7BP    | 2,021 | 2E-18 |
| NACAD     | 2,008 | 2E-18 |
| SVEP1     | 2,926 | 3E-18 |
| CRYAB     | 2,496 | 3E-18 |
| LRRC70    | 2,327 | 3E-18 |
| CASQ2     | 2,304 | 3E-18 |
| OXGR1     | 2,205 | 3E-18 |
| ZNF154    | 2,184 | 3E-18 |
| S1PR1     | 2,002 | 3E-18 |
| NOS1      | 3,279 | 4E-18 |
| RUNX1T1   | 2,299 | 4E-18 |
| L3MBTL4   | 2,217 | 4E-18 |
| CAPN3     | 2,042 | 4E-18 |
| JPH2      | 2,965 | 5E-18 |
| IGJ       | 2,763 | 5E-18 |
| PER1      | 2,721 | 5E-18 |
| ABCA6     | 2,655 | 5E-18 |
| CNTN1     | 2,240 | 5E-18 |
| LRRN4CL   | 3,040 | 6E-18 |
| TM4SF18   | 2,021 | 6E-18 |
| MMRN1     | 4,241 | 7E-18 |
| KCNA1     | 3,269 | 7E-18 |
| ALDH1A1   | 2,471 | 7E-18 |
| C14orf139 | 2,381 | 7E-18 |
| PPYR1     | 2,223 | 7E-18 |
| HRNR      | 2,593 | 8E-18 |
| ADRA1A    | 2,531 | 8E-18 |
| C20orf203 | 2,300 | 8E-18 |
| PLA2R1    | 2,037 | 8E-18 |
| RIMBP2    | 2,002 | 8E-18 |
| MUC15     | 2,618 | 9E-18 |
| HSD17B13  | 3,060 | 1E-17 |
| ADH1C     | 2,961 | 1E-17 |
| RGS2      | 2,704 | 1E-17 |
| ACACB     | 2,507 | 1E-17 |
| SYNPO2    | 2,433 | 1E-17 |
| SOX17     | 2,391 | 1E-17 |
| C14orf49  | 2,139 | 1E-17 |

|           |       |       |
|-----------|-------|-------|
| HHATL     | 6,064 | 2E-17 |
| ADH4      | 5,319 | 2E-17 |
| HEPN1     | 3,401 | 2E-17 |
| ATP1A2    | 3,154 | 2E-17 |
| CXCL3     | 2,967 | 2E-17 |
| ACTG2     | 2,878 | 2E-17 |
| SAA1      | 2,761 | 2E-17 |
| IGFN1     | 2,512 | 2E-17 |
| ACTA2     | 2,387 | 2E-17 |
| C10orf128 | 2,199 | 2E-17 |
| GLP1R     | 2,077 | 2E-17 |
| ETV3L     | 2,074 | 2E-17 |
| COL6A6    | 3,866 | 3E-17 |
| C1orf61   | 2,661 | 3E-17 |
| FAM180B   | 2,567 | 3E-17 |
| PAPPA2    | 2,523 | 3E-17 |
| MRGPRF    | 2,283 | 3E-17 |
| RHOXF1    | 2,213 | 3E-17 |
| ENPP6     | 2,133 | 3E-17 |
| LY75      | 2,088 | 3E-17 |
| UBE2Q2P1  | 2,086 | 3E-17 |
| PTPN14    | 2,054 | 3E-17 |
| AMPD1     | 3,047 | 4E-17 |
| FHL1      | 2,832 | 4E-17 |
| SORBS1    | 2,594 | 4E-17 |
| SRPX      | 2,454 | 4E-17 |
| ANXA1     | 2,307 | 4E-17 |
| CCDC158   | 2,194 | 4E-17 |
| TNFRSF10D | 2,133 | 4E-17 |
| ECSCR     | 2,036 | 4E-17 |
| C1QTNF9   | 2,555 | 5E-17 |
| KLF4      | 2,464 | 5E-17 |
| FCER1A    | 2,152 | 5E-17 |
| ABCG2     | 2,127 | 5E-17 |
| ANGPTL1   | 3,220 | 6E-17 |
| SLC2A4    | 3,192 | 6E-17 |
| CDO1      | 2,613 | 6E-17 |
| AMY2B     | 2,340 | 6E-17 |
| ZNF727    | 2,317 | 6E-17 |
| FAM162B   | 2,121 | 6E-17 |

|            |       |       |
|------------|-------|-------|
| CABP1      | 2,060 | 6E-17 |
| RASL10A    | 3,579 | 7E-17 |
| PENK       | 2,841 | 7E-17 |
| PPP1R1A    | 2,615 | 7E-17 |
| RGS6       | 2,316 | 7E-17 |
| P2RY12     | 2,564 | 8E-17 |
| ZDHHHC8P1  | 2,014 | 9E-17 |
| PKHD1L1    | 5,206 | 1E-16 |
| NCRNA00110 | 2,780 | 1E-16 |
| FAT4       | 2,073 | 1E-16 |
| CLEC3B     | 2,914 | 2E-16 |
| MFAP4      | 2,529 | 2E-16 |
| ADAMTS1    | 2,468 | 2E-16 |
| KCNIP1     | 2,377 | 2E-16 |
| MST1P9     | 2,263 | 2E-16 |
| STK32A     | 2,254 | 2E-16 |
| NMUR1      | 2,247 | 2E-16 |
| NBLA00301  | 2,194 | 2E-16 |
| DBX2       | 2,119 | 2E-16 |
| SELP       | 2,113 | 2E-16 |
| TMPRSS2    | 2,055 | 2E-16 |
| MAP1LC3C   | 2,927 | 3E-16 |
| LOC286002  | 2,462 | 3E-16 |
| EBF1       | 2,353 | 3E-16 |
| BAI1       | 2,221 | 3E-16 |
| PIWIL4     | 2,073 | 3E-16 |
| MAFF       | 2,048 | 3E-16 |
| AQP7P1     | 2,944 | 4E-16 |
| PID1       | 2,300 | 4E-16 |
| SLC28A3    | 2,163 | 4E-16 |
| HSPB6      | 3,216 | 5E-16 |
| PLAC9      | 2,525 | 5E-16 |
| LOC145820  | 2,505 | 5E-16 |
| MEG3       | 2,399 | 5E-16 |
| CREB5      | 2,076 | 5E-16 |
| GOLGA8A    | 2,073 | 5E-16 |
| F3         | 2,056 | 5E-16 |
| AMT        | 2,027 | 5E-16 |
| MYO1H      | 2,962 | 6E-16 |
| RSPO1      | 2,777 | 6E-16 |

|          |       |       |
|----------|-------|-------|
| RDH5     | 2,542 | 6E-16 |
| SAA2     | 2,430 | 6E-16 |
| ADH1B    | 3,111 | 7E-16 |
| NCAM1    | 2,636 | 7E-16 |
| IL1RAPL2 | 2,577 | 7E-16 |
| NNAT     | 2,508 | 7E-16 |
| SV2B     | 2,303 | 7E-16 |
| FAM181B  | 2,884 | 8E-16 |
| LRRN3    | 2,249 | 8E-16 |
| CLEC4GP1 | 2,072 | 8E-16 |
| ANGPT1   | 2,057 | 8E-16 |
| SULT1C3  | 4,074 | 1E-15 |
| FOSB     | 4,018 | 1E-15 |
| ITIH2    | 3,378 | 1E-15 |
| ADH1A    | 3,011 | 1E-15 |
| CACNA1G  | 2,444 | 1E-15 |
| PREX2    | 2,266 | 1E-15 |
| RPE65    | 2,241 | 1E-15 |
| C1QTNF4  | 2,234 | 1E-15 |
| SLC5A1   | 2,226 | 1E-15 |
| COL14A1  | 2,202 | 1E-15 |
| VIP      | 2,107 | 1E-15 |
| GLT1D1   | 2,094 | 1E-15 |
| CHRM1    | 2,067 | 1E-15 |
| SLC16A7  | 2,469 | 2E-15 |
| SCN9A    | 2,142 | 2E-15 |
| SOD3     | 2,106 | 2E-15 |
| TFPI     | 2,053 | 2E-15 |
| RSPO3    | 2,482 | 3E-15 |
| PDLIM3   | 2,251 | 3E-15 |
| C10orf10 | 2,119 | 3E-15 |
| PTGFR    | 2,096 | 3E-15 |
| GOLGA8B  | 2,035 | 3E-15 |
| FAM55D   | 2,031 | 3E-15 |
| ALDH1A3  | 2,023 | 3E-15 |
| CCDC69   | 2,023 | 3E-15 |
| CCL21    | 2,906 | 4E-15 |
| APOB     | 2,138 | 4E-15 |
| VWCE     | 2,018 | 4E-15 |
| MMP27    | 2,635 | 5E-15 |

|           |       |       |
|-----------|-------|-------|
| ELF5      | 2,128 | 5E-15 |
| ABI3BP    | 2,071 | 5E-15 |
| CCDC3     | 2,572 | 6E-15 |
| NCALD     | 2,410 | 6E-15 |
| PAR5      | 2,307 | 6E-15 |
| NRN1      | 2,203 | 7E-15 |
| LEP       | 3,311 | 8E-15 |
| FABP4     | 2,809 | 8E-15 |
| CLDN10    | 3,783 | 9E-15 |
| GPR182    | 2,623 | 1E-14 |
| TP53TG3B  | 2,580 | 1E-14 |
| CRHBP     | 2,459 | 1E-14 |
| SCN7A     | 2,399 | 1E-14 |
| PROKR1    | 2,371 | 1E-14 |
| GCOM1     | 2,288 | 1E-14 |
| PDZD2     | 2,126 | 1E-14 |
| TMC2      | 2,108 | 1E-14 |
| ANKRD20A3 | 2,051 | 1E-14 |
| SGK1      | 2,032 | 1E-14 |
| DMRT2     | 2,028 | 1E-14 |
| SLC22A3   | 2,009 | 1E-14 |
| AQP7      | 3,088 | 2E-14 |
| ACADL     | 2,540 | 2E-14 |
| GLRA3     | 2,417 | 2E-14 |
| GPR133    | 2,279 | 2E-14 |
| NEURL3    | 2,091 | 2E-14 |
| PCDHGA3   | 2,071 | 2E-14 |
| IQSEC3    | 2,028 | 2E-14 |
| ARC       | 2,016 | 2E-14 |
| LYVE1     | 4,847 | 3E-14 |
| LPL       | 3,080 | 3E-14 |
| CD36      | 2,610 | 3E-14 |
| AOC3      | 2,562 | 3E-14 |
| CCL23     | 2,457 | 3E-14 |
| CDH20     | 2,336 | 3E-14 |
| PTGS2     | 2,291 | 3E-14 |
| KCNIP2    | 3,092 | 4E-14 |
| GPX3      | 2,537 | 5E-14 |
| HSD17B2   | 2,194 | 5E-14 |
| DCDC2     | 2,179 | 5E-14 |

|           |       |       |
|-----------|-------|-------|
| IGF1      | 2,154 | 5E-14 |
| LOC283392 | 3,114 | 6E-14 |
| GALNTL2   | 2,404 | 6E-14 |
| EDN1      | 2,089 | 6E-14 |
| CNTFR     | 2,009 | 6E-14 |
| CITED1    | 3,237 | 7E-14 |
| ASPA      | 2,501 | 7E-14 |
| CMA1      | 3,665 | 8E-14 |
| CNTN2     | 2,650 | 8E-14 |
| SGK2      | 2,580 | 8E-14 |
| GLYAT     | 3,555 | 9E-14 |
| 42433     | 2,301 | 9E-14 |
| C7        | 2,171 | 9E-14 |
| C14orf180 | 2,813 | 1E-13 |
| SLC26A4   | 2,708 | 1E-13 |
| TIMP4     | 2,613 | 1E-13 |
| ZBTB8B    | 2,506 | 1E-13 |
| CSRNP1    | 2,180 | 1E-13 |
| CFD       | 2,085 | 1E-13 |
| TMEM213   | 2,056 | 1E-13 |
| TUSC5     | 3,184 | 2E-13 |
| GPD1      | 3,178 | 2E-13 |
| CIDEC     | 3,173 | 2E-13 |
| GPAM      | 2,999 | 2E-13 |
| SEMA3D    | 2,524 | 2E-13 |
| ACSM5     | 2,470 | 2E-13 |
| HPD       | 2,260 | 2E-13 |
| XPNPEP2   | 2,230 | 2E-13 |
| DMGDH     | 2,152 | 2E-13 |
| PLIN1     | 3,323 | 3E-13 |
| ACVR1C    | 3,260 | 3E-13 |
| LIPE      | 2,668 | 3E-13 |
| ATP13A4   | 2,009 | 3E-13 |
| PLIN4     | 3,082 | 4E-13 |
| OGN       | 2,259 | 4E-13 |
| GPR123    | 2,083 | 4E-13 |
| C7orf58   | 2,050 | 4E-13 |
| LOC643763 | 2,239 | 5E-13 |
| CLEC4G    | 2,947 | 6E-13 |
| PPARG     | 2,353 | 6E-13 |

|          |       |       |
|----------|-------|-------|
| POU3F3   | 3,010 | 7E-13 |
| PCOLCE2  | 2,777 | 7E-13 |
| MRGPRX2  | 2,185 | 7E-13 |
| HSD3B2   | 2,432 | 8E-13 |
| SLC19A3  | 3,122 | 1E-12 |
| ATF3     | 2,588 | 1E-12 |
| AQP7P3   | 2,341 | 1E-12 |
| CIDEA    | 2,300 | 1E-12 |
| MAOA     | 2,113 | 1E-12 |
| LOC90586 | 2,097 | 1E-12 |
| AKAP12   | 2,005 | 1E-12 |
| MEGF11   | 3,750 | 2E-12 |
| HBB      | 2,983 | 2E-12 |
| ZFP36    | 2,328 | 2E-12 |
| EGF      | 2,244 | 2E-12 |
| PCDH8    | 2,098 | 2E-12 |
| CXCL12   | 2,012 | 2E-12 |
| BTN1A1   | 2,144 | 3E-12 |
| FMN2     | 2,097 | 3E-12 |
| LRMP     | 3,212 | 4E-12 |
| KLB      | 2,810 | 4E-12 |
| FRMPD4   | 2,431 | 4E-12 |
| C3orf55  | 2,234 | 4E-12 |
| ABCD2    | 2,507 | 5E-12 |
| EBF2     | 2,032 | 5E-12 |
| ZP2      | 3,880 | 6E-12 |
| FOS      | 2,539 | 6E-12 |
| ADIPOQ   | 2,917 | 7E-12 |
| PCK1     | 2,651 | 7E-12 |
| C12orf53 | 2,492 | 7E-12 |
| DPT      | 2,467 | 7E-12 |
| KLHL31   | 2,155 | 7E-12 |
| CYR61    | 2,147 | 7E-12 |
| DUSP1    | 2,047 | 9E-12 |
| FRMPD2   | 3,632 | 1E-11 |
| PGA3     | 2,177 | 1E-11 |
| GPR15    | 2,164 | 1E-11 |
| GHR      | 2,011 | 1E-11 |
| RBP4     | 3,242 | 2E-11 |
| CCDC141  | 2,808 | 2E-11 |

|          |       |       |
|----------|-------|-------|
| ODF3L1   | 2,259 | 2E-11 |
| SLC26A3  | 2,213 | 2E-11 |
| FOXP2    | 2,129 | 2E-11 |
| MRAP     | 3,325 | 3E-11 |
| HSPB7    | 3,118 | 3E-11 |
| NTF3     | 2,059 | 6E-11 |
| GGT8P    | 2,099 | 7E-11 |
| PRRT4    | 2,734 | 8E-11 |
| SLC7A10  | 2,720 | 8E-11 |
| PIRT     | 6,375 | 1E-10 |
| CSF3     | 5,150 | 1E-10 |
| AQPEP    | 3,428 | 1E-10 |
| FAM19A1  | 3,019 | 1E-10 |
| MIA2     | 2,629 | 1E-10 |
| HBA2     | 2,554 | 1E-10 |
| LHCGR    | 2,064 | 1E-10 |
| SLIT3    | 2,013 | 1E-10 |
| KIAA0408 | 3,122 | 2E-10 |
| KLK2     | 2,850 | 2E-10 |
| LGALS12  | 2,600 | 2E-10 |
| FRMD1    | 2,232 | 2E-10 |
| GPR109A  | 2,118 | 2E-10 |
| KCNA5    | 2,085 | 2E-10 |
| GPR97    | 2,190 | 3E-10 |
| CTSG     | 2,060 | 3E-10 |
| AKR1C1   | 2,058 | 3E-10 |
| LST      | 4,418 | 4E-10 |
| SCGN     | 2,706 | 4E-10 |
| NR4A1    | 2,388 | 4E-10 |
| PKD1L2   | 2,195 | 4E-10 |
| CD209    | 2,266 | 5E-10 |
| PLXNA4   | 2,220 | 5E-10 |
| UGT2B28  | 2,739 | 6E-10 |
| SCG3     | 2,092 | 9E-10 |
| DMP1     | 2,932 | 1E-09 |
| MYEOV    | 2,172 | 1E-09 |
| CDH8     | 2,010 | 1E-09 |
| GYS2     | 3,050 | 2E-09 |
| CES1     | 2,352 | 2E-09 |
| EPB42    | 2,207 | 2E-09 |

|          |       |       |
|----------|-------|-------|
| BHMT2    | 2,060 | 2E-09 |
| HBA1     | 2,656 | 4E-09 |
| GOS2     | 2,473 | 4E-09 |
| AADAC    | 2,711 | 5E-09 |
| NRSN1    | 7,530 | 7E-09 |
| SEL1L2   | 2,475 | 9E-09 |
| MUC7     | 2,634 | 1E-08 |
| KRT32    | 2,221 | 1E-08 |
| MLXIPL   | 2,173 | 1E-08 |
| LHFPL3   | 4,544 | 2E-08 |
| FAM101A  | 2,199 | 2E-08 |
| TMED6    | 2,839 | 4E-08 |
| C12orf39 | 3,900 | 5E-08 |
| LOC55908 | 2,290 | 5E-08 |
| GYG2     | 2,360 | 7E-08 |
| LMX1A    | 2,207 | 7E-08 |
| COL19A1  | 2,099 | 7E-08 |
