# Supplementary material for: ΔNp73 regulates the expression of the multidrug-resistance genes ABCB1 and ABCB5 in breast cancer and melanoma cells - a short report
Source: PubMed Central journal article supplement (PMC5705756; doi:10.1007/s13402-017-0340-x), 2017-07-04
Supplement: 13402_2017_340_MOESM3_ESM.pdf [file 13402_2017_340_MOESM3_ESM.pdf]

Article Title:  $\Delta$ Np73 regulates the expression of the multidrug-resistance genes *ABCB1* and *ABCB5* in breast cancer and melanoma cells - a short report  
 Journal Name: Cellular Oncology  
 Authors Names: Habib A. M. Sakil1, Marina Stantic1, Johanna Wolfsberger1, Suzanne Egyhazi Brage2, Johan Hansson2, and Margareta T. Wilhelm1\*

Affiliation: 1) Karolinska Institutet, Department of Microbiology, Tumor and Cell biology (MTC), 171 77 Stockholm, Sweden  
 2) Karolinska Institutet, Department of Oncology-Pathology, 171 76 Stockholm, Sweden

\*Corresponding Author: Margareta T. Wilhelm  
 email: Margareta.Wilhelm@ki.se

**Supplementary Table 3** KEGG pathway analysis. List of genes and pathways that were enriched in  $\Delta$ Np73 high expressing breast cancer samples.

| Category     | Term                                             | Count | %           | PValue      | Genes                                                                                                                                                                                                       | List Total | Pop Hits | Pop Total | Fold Enrichm | Bonferroni | Benjamini  | FDR        |
|--------------|--------------------------------------------------|-------|-------------|-------------|-------------------------------------------------------------------------------------------------------------------------------------------------------------------------------------------------------------|------------|----------|-----------|--------------|------------|------------|------------|
| KEGG_PATHWAY | hsa02010:ABC transporters                        | 9     | 0,992282249 | 0,001767633 | ABCA8, ABCA10, ABCA9, ABCD2, ABCB1, ABCB5, ABCA6, ABCA5, ABCG2                                                                                                                                              | 268        | 44       | 5085      | 3,88102103   | 0,2152421  | 0,05879565 | 2,05807023 |
| KEGG_PATHWAY | hsa00350:Tyrosine metabolism                     | 8     | 0,882028666 | 0,007322613 | DCT, MAOA, ADH4, ALDH1A3, ADH1C, ADH1B, TPO, ADH1A, AOC3, HPD                                                                                                                                               | 268        | 44       | 5085      | 3,44979647   | 0,63464617 | 0,13397481 | 8,27616154 |
| KEGG_PATHWAY | hsa03320:PPAR signaling pathway                  | 11    | 1,212789416 | 0,002925265 | LPL, CD36, SORBS1, PLIN1, PPARG, SLC27A6, FABP4, AQP7, ACADL, ADIPOQ, PCK1                                                                                                                                  | 268        | 69       | 5085      | 3,02482154   | 0,33058337 | 0,07713261 | 3,38483211 |
| KEGG_PATHWAY | hsa04512:ECM-receptor interaction                | 12    | 1,323042999 | 0,004135891 | LAMA1, LAMB3, LAMA3, CD36, TNXB, COL6A6, LAMC3, ITGA7, ITGA10, SV2B, RELN, COL4A6                                                                                                                           | 268        | 84       | 5085      | 2,71055437   | 0,43322452 | 0,09029236 | 4,75472253 |
| KEGG_PATHWAY | hsa05218:Melanoma                                | 10    | 1,102535832 | 0,011287258 | EGFR, PDGFA, FGF17, MET, IGF1, PDGFD, EGF, FGF1, FGF2, PIK3R1                                                                                                                                               | 268        | 71       | 5085      | 2,67237755   | 0,7888418  | 0,17666611 | 12,4908419 |
| KEGG_PATHWAY | hsa04610:Complement and coagulation cascades     | 9     | 0,992282249 | 0,026979953 | C7, F10, MASP1, MASP2, F3, TFPI, C4BPA, CFD, PROS1                                                                                                                                                          | 268        | 69       | 5085      | 2,47485399   | 0,97641233 | 0,2886845  | 27,4927324 |
| KEGG_PATHWAY | hsa04060:Cytokine-cytokine receptor interaction  | 31    | 3,41786108  | 3,43E-05    | CSF3, IL22RA1, PDGFA, CXCL3, LEPR, CXCL2, CNTFR, CX3CL1, KIT, CXCL12, CCL28, CCL23, IL17B, IFNE, CCL21, TPO, EGF, FIGF, GHR, EGFR, MET, TGFB2, LIFR, EDAR, CCL16, IL11RA, LEP, TSLP, CCL14, TNFRSF10D, NGFR | 268        | 262      | 5085      | 2,24500114   | 0,00468147 | 0,00468147 | 0,0402517  |
| KEGG_PATHWAY | hsa04510:Focal adhesion                          | 23    | 2,535832415 | 7,47E-04    | EGFR, CAV2, CAV1, TNXB, PDGFA, MET, ITGA10, IGF1, COL4A6, LAMA1, PAK7, LAMB3, LAMA3, COL6A6, LAMC3, PAK3, ITGA7, RELN, PDGFD, EGF, FIGF, PIK3R1, MYLK                                                       | 268        | 201      | 5085      | 2,17114057   | 0,09734453 | 0,03356198 | 0,87483334 |
| KEGG_PATHWAY | hsa04080:Neuroactive ligand-receptor interaction | 28    | 3,087100331 | 3,45E-04    | AVPR2, DRD2, NPY2R, GLRA3, LEPR, TACR1, ADCYAP1R1, LHCGR, PPR1, GRIK5, OXTR, EDNRB, S1PR1, NMUR1, GABRP, GHR, GABRA4, GRIA4, PTGFR, LEP, CRHR1, ADRB2, SSTR1, CHRM1, ADRA1A, GLP1R, CTSG, HTR2A             | 268        | 256      | 5085      | 2,07526819   | 0,04621629 | 0,02338149 | 0,40515348 |
| KEGG_PATHWAY | hsa04514:Cell adhesion molecules (CAMs)          | 14    | 1,543550165 | 0,020399401 | CLDN8, SELP, CADM3, CLDN19, CLDN5, NLGN1, CLDN10, NRXN1, CLDN11, CDH4, NCAM1, CNTN2, CNTN1, JAM2                                                                                                            | 268        | 132      | 5085      | 2,01238128   | 0,94060926 | 0,26928751 | 21,5145842 |
| KEGG_PATHWAY | hsa04020:Calcium signaling pathway               | 16    | 1,764057332 | 0,042239183 | EGFR, NOS1, TACR1, LHCGR, OXTR, PTGFR, EDNRB, GNAL, ADRB2, PDE1C, RYR3, CHRM1, CACNA1G, ADRA1A, MYLK, HTR2A                                                                                                 | 268        | 176      | 5085      | 1,72489824   | 0,99729468 | 0,38903242 | 39,7866964 |
| KEGG_PATHWAY | hsa05200:Pathways in cancer                      | 27    | 2,976846748 | 0,021392058 | PTGS2, PDGFA, FGF17, PPARG, KIT, ZBTB16, ACVR1C, FOS, LAMB3, RARB, EGF, FGF1, FIGF, FGF2, PIK3R1, EGFR, TGFB2, MET, RUNX1T1, IGF1, FZD7, COL4A6, LAMA1, LAMA3, LAMC3, PTCH1, PTCH2                          | 268        | 328      | 5085      | 1,56187432   | 0,94831116 | 0,25639949 | 22,4443341 |
