# Supplementary material for: ΔNp73 regulates the expression of the multidrug-resistance genes ABCB1 and ABCB5 in breast cancer and melanoma cells - a short report
Source: PubMed Central journal article supplement (PMC5705756; doi:10.1007/s13402-017-0340-x), 2017-07-04
Supplement: 13402_2017_340_MOESM4_ESM.pdf [file 13402_2017_340_MOESM4_ESM.pdf]

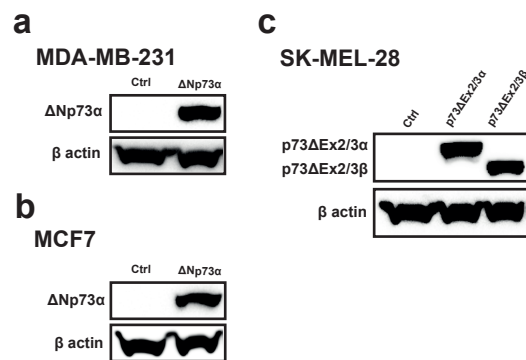

**Supplementary Fig. 1** Representative western blots showing overexpression of  $\Delta$ Np73 $\alpha$ , p73 $\Delta$ Ex2/3 $\alpha$  and p73 $\Delta$ Ex2/3 $\beta$  isoforms. **(a, b)** Ectopic expression of pcDNA3.1 or pcDNA3.1- $\Delta$ Np73 $\alpha$  in MCF7 and MDA-MB-231 cells. **(c)** Ectopic expression of pcDNA3.1 or pcDNA3.1-p73 $\Delta$ Ex2/3 $\alpha$  and p73 $\Delta$ Ex2/3 $\beta$  in SK-MEL-28 cell lines. Cells were harvested 16 hours after transfection and lysed. Twenty  $\mu$ g total protein lysate was fractionated by electrophoresis and transferred onto nitrocellulose membranes and blotted for p73-isoforms.  $\beta$ -actin was used as a loading control. Representative blots from three independent experiments.
