# Supplementary material for: ΔNp73 regulates the expression of the multidrug-resistance genes ABCB1 and ABCB5 in breast cancer and melanoma cells - a short report
Source: PubMed Central journal article supplement (PMC5705756; doi:10.1007/s13402-017-0340-x), 2017-07-04
Supplement: 13402_2017_340_MOESM5_ESM.pdf [file 13402_2017_340_MOESM5_ESM.pdf]

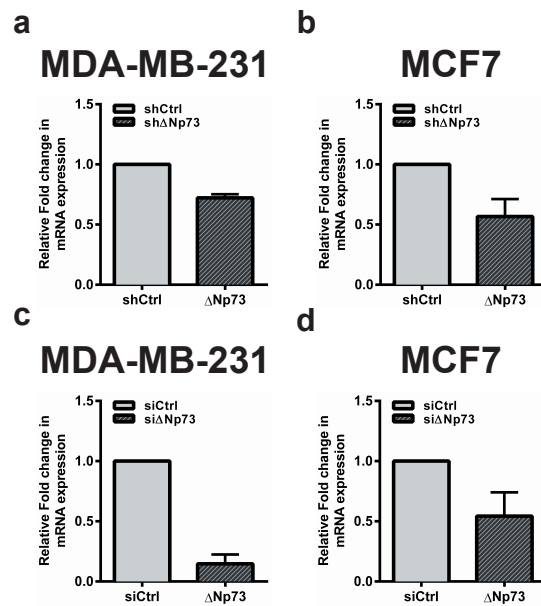

**Supplementary Fig. 2** Validation of knockdown efficiency of  $\Delta$ Np73 in MCF7 and MDA-MB-231 cells. **(a, b)** MCF7 and MDA-MB-231 cells with shRNA-mediated stable knockdown of  $\Delta$ Np73 in MCF7 and MDA-MB-231 cells. **(c, d)** MCF7 and MDA-MB-231 cells with siRNA-mediated transient knockdown of  $\Delta$ Np73. Expression levels of  $\Delta$ Np73 was measured by qRT-PCR using  $\Delta$ Np73-specific Taqman assays. All samples were run in triplicate in three independent experiments and normalized to GAPDH mRNA. Relative expression was calculated using the  $\Delta\Delta$ CT method, and presented as mean fold change  $\pm$  S.E.M.
